# Supplementary material
Source: Springer Nature journal article supplement (https://www.springermedizin.de/resource/supplementary/12876_2009_459_MOESM2_ESM.pdf/9437058)

**T****N**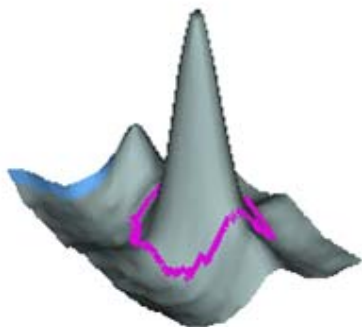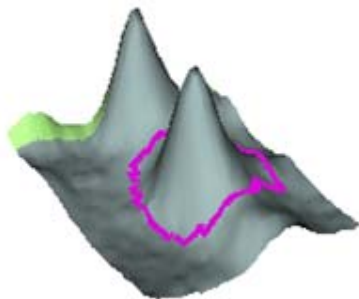**A**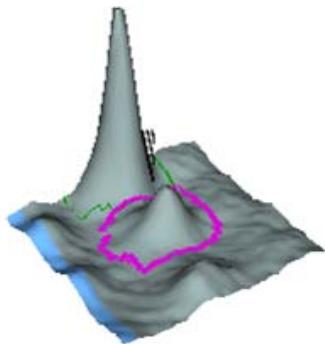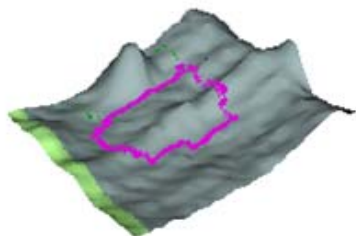**B**

Supplement: MOESM2 [file 9437058]
